# Supplementary material
Source: PubMed Central journal article supplement (PMC6609948)
Supplement: DC182198SupplementaryData.pdf [file DC182198SupplementaryData.pdf]

SUPPLEMENTARY DATA

**Supplementary Table S1.** Relative risks and 95% CIs of gestational diabetes according to pre-pregnancy intake of supplementary folate, adjusted for intakes of other micronutrients and multivitamin

|                             | RR (95% CI)*      |
|-----------------------------|-------------------|
| Adjusted for vitamin B1     |                   |
| Supplemental folate, µg/day |                   |
| 0                           | 1.00 (ref)        |
| 1-399                       | 0.81 (0.66, 0.99) |
| 400-599                     | 0.72 (0.55, 0.93) |
| ≥ 600                       | 0.64 (0.45, 0.91) |
| P-trend                     | 0.01              |
| Adjusted for vitamin B2     |                   |
| Supplemental folate, µg/day |                   |
| 0                           | 1.00 (ref)        |
| 1-399                       | 0.80 (0.67, 0.97) |
| 400-599                     | 0.74 (0.58, 0.95) |
| ≥ 600                       | 0.69 (0.49, 0.99) |
| P-trend                     | 0.03              |
| Adjusted for vitamin B3     |                   |
| Supplemental folate, µg/day |                   |
| 0                           | 1.00 (ref)        |
| 1-399                       | 0.83 (0.69, 1.01) |
| 400-599                     | 0.74 (0.58, 0.96) |
| ≥ 600                       | 0.67 (0.48, 0.95) |
| P-trend                     | 0.02              |
| Adjusted for vitamin B5     |                   |
| Supplemental folate, µg/day |                   |
| 0                           | 1.00 (ref)        |
| 1-399                       | 0.79 (0.65, 0.96) |
| 400-599                     | 0.74 (0.59, 0.94) |
| ≥ 600                       | 0.67 (0.49, 0.92) |
| P-trend                     | 0.008             |
| Adjusted for vitamin B6     |                   |
| Supplemental folate, µg/day |                   |
| 0                           | 1.00 (ref)        |
| 1-399                       | 0.83 (0.68, 1.01) |
| 400-599                     | 0.76 (0.58, 0.98) |
| ≥ 600                       | 0.67 (0.47, 0.96) |
| P-trend                     | 0.03              |
| Adjusted for vitamin B12    |                   |
| Supplemental folate, µg/day |                   |
| 0                           | 1.00 (ref)        |
| 1-399                       | 0.80 (0.67, 0.95) |

SUPPLEMENTARY DATA

|                                  |                   |
|----------------------------------|-------------------|
| 400-599                          | 0.73 (0.58, 0.92) |
| ≥ 600                            | 0.69 (0.50, 0.97) |
| P-trend                          | 0.01              |
| Adjusted for vitamin A           |                   |
| Supplemental folate, µg/day      |                   |
| 0                                | 1.00 (ref)        |
| 1-399                            | 0.78 (0.66, 0.94) |
| 400-599                          | 0.70 (0.55, 0.88) |
| ≥ 600                            | 0.63 (0.45, 0.87) |
| P-trend                          | 0.003             |
| Adjusted for vitamin C           |                   |
| Supplemental folate, µg/day      |                   |
| 0                                | 1.00 (ref)        |
| 1-399                            | 0.81 (0.69, 0.96) |
| 400-599                          | 0.73 (0.59, 0.90) |
| ≥ 600                            | 0.65 (0.48, 0.89) |
| P-trend                          | 0.001             |
| Adjusted for vitamin D           |                   |
| Supplemental folate, µg/day      |                   |
| 0                                | 1.00 (ref)        |
| 1-399                            | 0.82 (0.69, 0.98) |
| 400-599                          | 0.70 (0.54, 0.90) |
| ≥ 600                            | 0.60 (0.42, 0.87) |
| P-trend                          | 0.004             |
| Adjusted for calcium             |                   |
| Supplemental folate, µg/day      |                   |
| 0                                | 1.00 (ref)        |
| 1-399                            | 0.84 (0.71, 0.98) |
| 400-599                          | 0.77 (0.63, 0.94) |
| ≥ 600                            | 0.70 (0.51, 0.95) |
| P-trend                          | 0.004             |
| Adjusted for magnesium           |                   |
| Supplemental folate, µg/day      |                   |
| 0                                | 1.00 (ref)        |
| 1-399                            | 0.83 (0.70, 0.97) |
| 400-599                          | 0.75 (0.62, 0.92) |
| ≥ 600                            | 0.68 (0.50, 0.92) |
| P-trend                          | 0.002             |
| Adjusted for multivitamin intake |                   |
| Supplemental folate, µg/day      |                   |
| 0                                | 1.00 (ref)        |
| 1-399                            | 0.81 (0.66, 1.00) |
| 400-599                          | 0.73 (0.52, 1.02) |

## SUPPLEMENTARY DATA

|            |                   |
|------------|-------------------|
| $\geq 600$ | 0.65 (0.42, 1.01) |
| P-trend    | 0.10              |

\*Adjusted for quartiles of each micronutrient intake or daily frequencies of multivitamin use, in addition to age (months), race (White, African American, Hispanic, Asian and others), parity (0, 1, 2,  $\geq 3$ ), family history of diabetes (yes, no), physical activity (quartiles), pre-pregnancy BMI (<21.0, 21.0–22.9, 23.0–24.9, 25.0–26.9, 27.0–28.9, 29.0–30.9, 31.0–32.9, 33.0–34.9 and  $\geq 35.0$  kg/m<sup>2</sup>), cigarette smoking (never, past, current) and alcohol use (0, 0.1–5.0, 5.1–9.9,  $\geq 10$  grams/day), quartiles of dietary intakes of total energy, glycemic load, saturated fat, total fiber and heme iron.

SUPPLEMENTARY DATA

**Supplementary Figure S1.** Relative risks and 95% CIs of gestational diabetes according to pre-pregnancy intake of supplemental folate among women who were married and not using oral contraceptive (1), who concurrently used ovulation induction medications (2) and who had concurrent infertility (3).

Groups (1), (2) and (3) included 14594, 2159 and 1984 pregnancies, respectively. Models adjusted for age (months), race (White, others) nulliparity (yes, no), family history of diabetes (yes, no), physical activity (MET-h/wk), pre-pregnancy BMI (<21.0, 21.0–22.9, 23.0–24.9, 25.0–26.9, 27.0–28.9, 29.0–30.9, 31.0–32.9, 33.0–34.9 and  $\geq 35.0$  kg/m<sup>2</sup>), current smoking (yes, no), alcohol use (yes, no), and dietary intakes of total energy (kcal/d), glycemic load (unit), saturated fat (% energy), total fiber (g/d) and heme iron (mg/d). Q – quartile. OC – oral contraceptive.

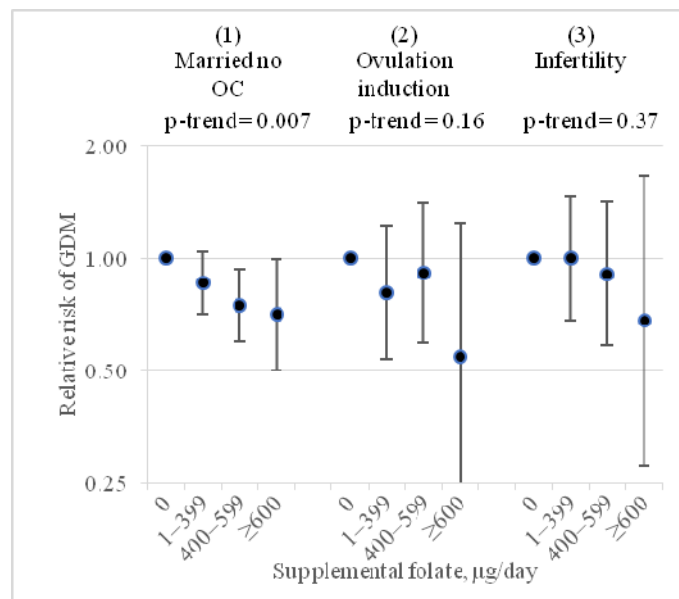

SUPPLEMENTARY DATA

**Supplementary Table S2.** Relative risks (95% CIs) of gestational diabetes according to updated\* pre-pregnancy folate intake

|                                    | GDM/<br>Pregnancy | Model 1†          | Model 2‡          | Model 3§          |
|------------------------------------|-------------------|-------------------|-------------------|-------------------|
| Total folate  , µg/day             |                   |                   |                   |                   |
| Q1 (81–293)                        | 243/4858          | 1.00 (ref)        | 1.00 (ref)        | 1.00 (ref)        |
| Q2 (294–422)                       | 211/4863          | 0.85 (0.71, 1.01) | 0.95 (0.79, 1.13) | 1.00 (0.83, 1.20) |
| Q3 (423–697)                       | 173/4860          | 0.69 (0.57, 0.84) | 0.79 (0.65, 0.96) | 0.84 (0.69, 1.03) |
| Q4 (698–3363)                      | 166/4861          | 0.65 (0.54, 0.79) | 0.73 (0.60, 0.88) | 0.78 (0.65, 0.95) |
| P-trend                            |                   | <0.001            | 0.003             | 0.003             |
| Per 100 µg/day increase            |                   | 0.95 (0.93, 0.97) | 0.96 (0.94, 0.98) | 0.97 (0.95, 0.99) |
| Total folate <sup>e</sup> , µg/day |                   |                   |                   |                   |
| Inadequate (<400)                  | 465/9872          | 1.00 (ref)        | 1.00 (ref)        | 1.00 (ref)        |
| Adequate (≥400)                    | 359/10327         | 0.73 (0.64, 0.84) | 0.76 (0.66, 0.87) | 0.80 (0.69, 0.91) |
| P-value                            |                   | <0.001            | 0.001             | 0.001             |
| Supplemental folate, µg/day        |                   |                   |                   |                   |
| 0                                  | 436/9377          | 1.00 (ref)        | 1.00 (ref)        | 1.00 (ref)        |
| 1–399                              | 168/4411          | 0.79 (0.67, 0.95) | 0.84 (0.70, 0.99) | 0.84 (0.71, 1.00) |
| 400–599                            | 122/3716          | 0.70 (0.57, 0.85) | 0.73 (0.60, 0.88) | 0.74 (0.61, 0.90) |
| ≥600                               | 67/1938           | 0.71 (0.55, 0.92) | 0.73 (0.57, 0.93) | 0.74 (0.58, 0.95) |
| P-trend                            |                   | 0.001             | 0.001             | 0.002             |
| Per 100 µg/day increase            |                   | 0.95 (0.93, 0.98) | 0.95 (0.93, 0.98) | 0.96 (0.93, 0.98) |
| Food folate, µg/day                |                   |                   |                   |                   |
| Q1 (46–212)                        | 206/4860          | 1.00 (ref)        | 1.00 (ref)        | 1.00 (ref)        |
| Q2 (213–254)                       | 217/4861          | 1.03 (0.86, 1.25) | 1.16 (0.96, 1.40) | 1.21 (1.00, 1.46) |
| Q3 (255–302)                       | 195/4861          | 0.92 (0.76, 1.11) | 1.09 (0.90, 1.32) | 1.18 (0.97, 1.45) |
| Q4 (303–833)                       | 175/4860          | 0.80 (0.65, 0.97) | 0.93 (0.76, 1.14) | 1.11 (0.88, 1.39) |
| P-trend                            |                   | 0.01              | 0.29              | 0.76              |
| Per 100 µg/day increase            |                   | 0.87 (0.79, 0.96) | 0.95 (0.86, 1.04) | 1.04 (0.93, 1.15) |

Q-quartile.

\*Intake from the most recent dietary assessment before pregnancy. This is an alternative to the cumulative average intake before pregnancy in the main analysis.

†Adjusted for age (months)

‡Added parity (0, 1, 2, ≥3), family history of diabetes (yes, no), physical activity (quartiles), pre-pregnancy BMI (<21.0, 21.0–22.9, 23.0–24.9, 25.0–26.9, 27.0–28.9, 29.0–30.9, 31.0–32.9, 33.0–34.9 and ≥35.0 kg/m<sup>2</sup>), cigarette smoking (never, past, current) and alcohol use (0, 0.1–5.0, 5.1–9.9, ≥10 grams/day) to model 1

§Added quartiles of updated dietary intakes of total energy, glycemic load, saturated fat, total fiber and heme iron to model 2

||Includes food folate and folic acid from supplements and fortified food.
